# Supplementary material
Source: PubMed Central journal article supplement (PMC7164688)
Supplement: NIHMS1572941-supplement-2.pdf [file NIHMS1572941-supplement-2.pdf]

**Supporting Information for:**

**Separation and detection of trace fentanyl from complex mixtures using  
gradient elution moving boundary electrophoresis**

Shannon T. Krauss<sup>a</sup>, David Ross<sup>a</sup>, and Thomas P. Forbes<sup>a\*</sup>

*<sup>a</sup>National Institute of Standards and Technology, 100 Bureau Drive, Gaithersburg, Maryland  
20899, USA.*

\*Corresponding author: E-mail: [thomas.forbes@nist.gov](mailto:thomas.forbes@nist.gov); Tel: 1-301-975-2111

## Table of Contents

|                                                                                                                                |            |
|--------------------------------------------------------------------------------------------------------------------------------|------------|
| <b>Experimental Methods.</b> Resolution between two analytes.....                                                              | <b>S-3</b> |
| <b>Figure S1.</b> Separation of heroin and fentanyl at varied electric field strengths.....                                    | <b>S-3</b> |
| <b>Figure S2.</b> Separation of heroin and fentanyl at varied pressure ramp rates (counterflow acceleration) .....             | <b>S-4</b> |
| <b>Figure S3.</b> Fentanyl and heroin standard curves.....                                                                     | <b>S-5</b> |
| <b>Figure S4.</b> Fentanyl signal suppression as a function of binary mixture ratios for caffeine.....                         | <b>S-5</b> |
| <b>Figure S5.</b> Representative GEMBE separation of narcotics mixture.....                                                    | <b>S-6</b> |
| <b>Figure S6.</b> GEMBE separation of demonstrative narcotic mixture containing excipients.....                                | <b>S-7</b> |
| <b>Figure S7.</b> Fentanyl signal suppression as a function of competing compound signal for various concentration ratios..... | <b>S-8</b> |
| <b>Figure S8.</b> Representative chromatograms for adjudicated case samples.....                                               | <b>S-9</b> |

## Experimental Methods

*Resolution between two analytes.* The resolution,  $R$ , between two analytes with differing peak/step widths for a GEMBE separation has been discussed previously, and was calculated by the following equation:

$$R = \frac{\Delta t}{2(\sigma_1 + \sigma_2)} \quad (1)$$

where  $\Delta t$  is the step spacing between the two analytes;  $\sigma_1$  and  $\sigma_2$  are the step widths or the standard deviations of the temporal derivative of the step shape for each analyte.<sup>1</sup>

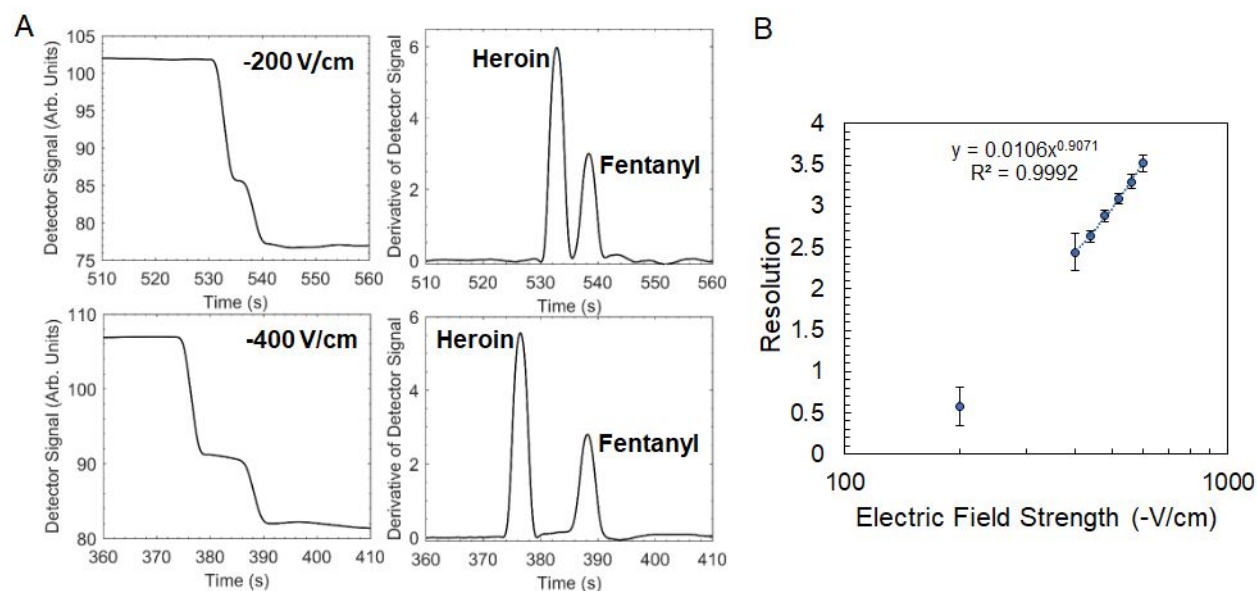

**Figure S1.** GEMBE separation of binary heroin and fentanyl mixture at varied electric field strengths. (A) Representative raw data and derivative plots showing stepwise decreases in conductivity from the elution of 50  $\mu\text{mol/L}$  heroin and fentanyl at two different electric field strengths. (B) Plot showing increased resolution of heroin and fentanyl steps as the electric field strength increased. Separation conditions included pressure starting at 14.5 kPa and decreasing at -25 Pa/s. Average and standard deviations represented for 8 replicates.

<sup>1</sup> Ross, D. *Electrophoresis* **2010**, *31*, 3650-3657.

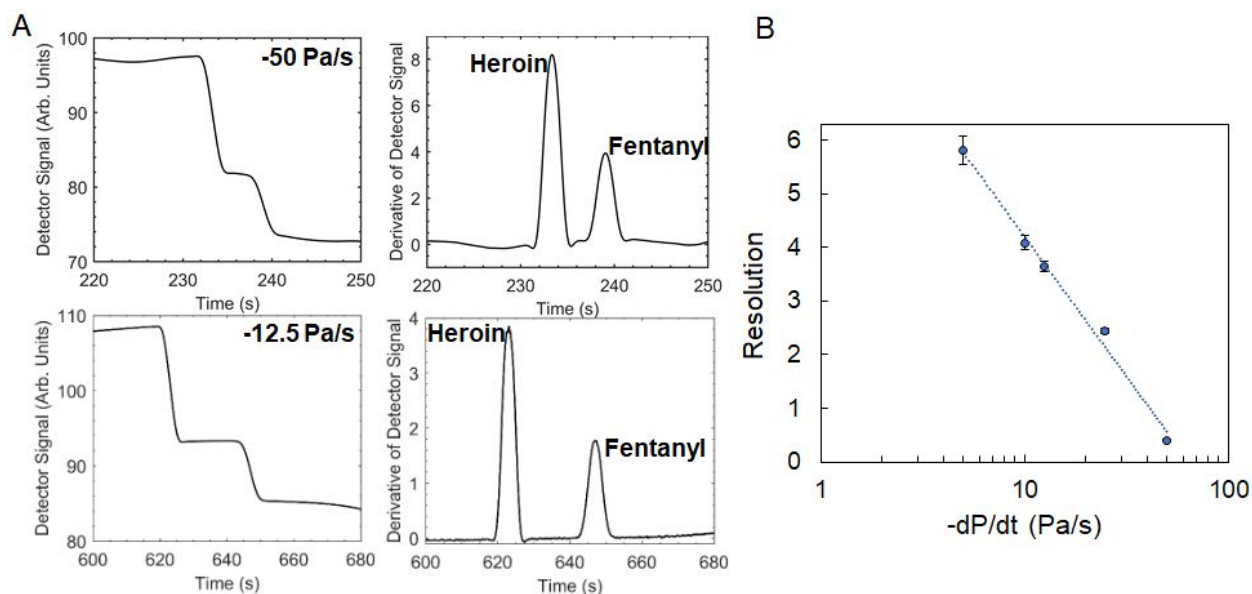

**Figure S2.** GEMBE separation of binary heroin and fentanyl mixture at varied pressure ramp rates (counterflow acceleration). (A) Representative raw data and derivative plots showing stepwise decreases in conductivity from the elution of  $50 \mu\text{mol/L}$  heroin and fentanyl at two different pressure ramp rates. (B) Plot showing decreased resolution of heroin and fentanyl steps as the pressure ramp rate increased. Separation conditions included a  $-400 \text{ V/cm}$  electric field and pressure starting at  $14.5 \text{ kPa}$ . Average and standard deviations represented for 9 replicates.

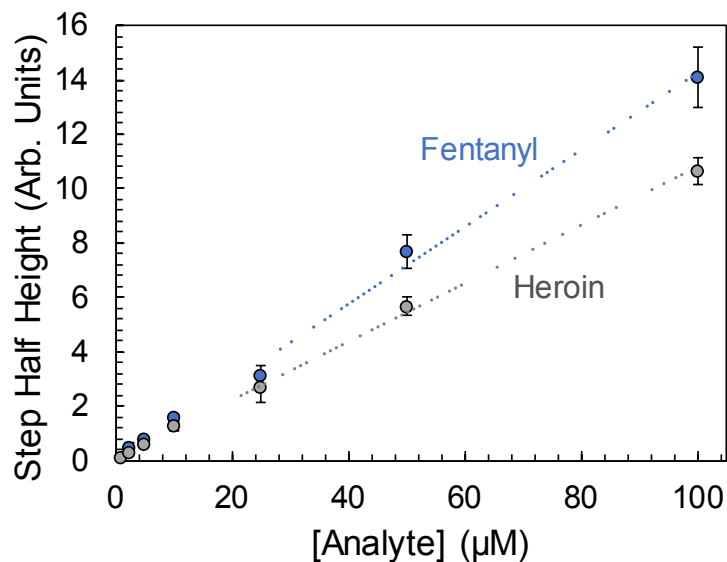

**Figure S3.** Fentanyl and heroin standard curve of the measured step half height signal at varied concentrations to empirically determine the limits of detection. Separation conditions included a -560 V/cm electric field and pressure starting at 14.5 kPa and decreasing at -25 Pa/s. Average and standard deviations represented for 7 to 10 replicates.

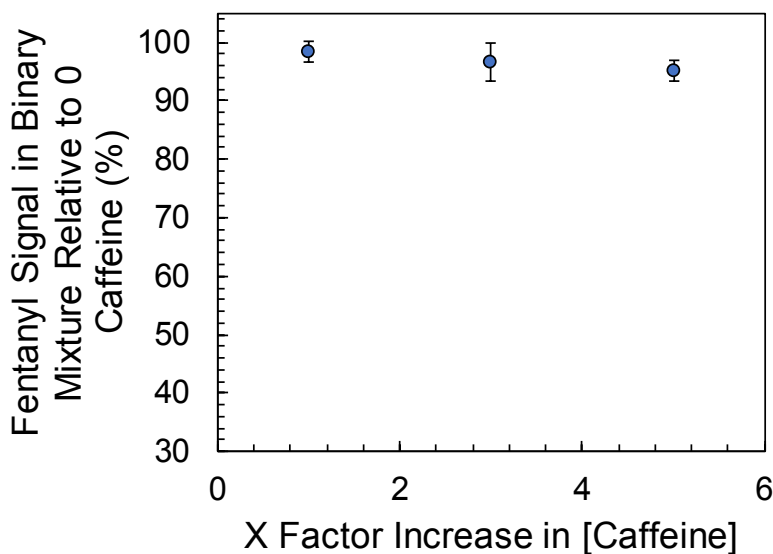

**Figure S4.** Fentanyl signal suppression as a function of binary mixture ratios for caffeine. Concentration ratio given as (caffeine : fentanyl) with fentanyl a constant 10 µmol/L. Separation conditions included a -560 V/cm electric field and pressure starting at 14.5 kPa and decreasing at -25 Pa/s. Average and standard deviations represented for 6 replicates.

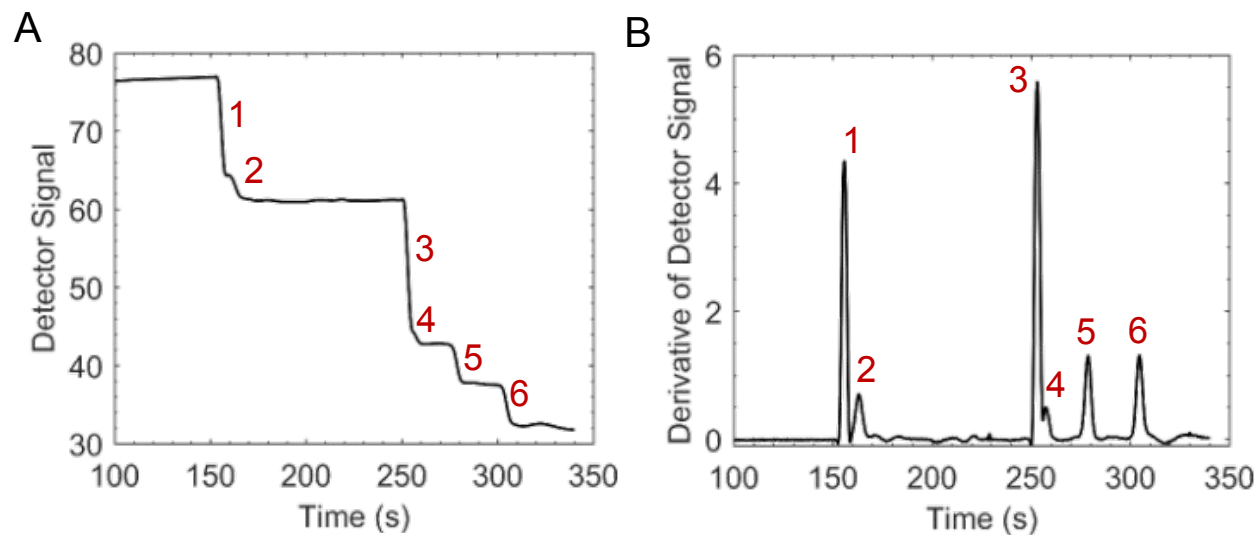

**Figure S5.** (A) Representative GEMBE separation of narcotics mixture containing (1) amphetamine, (2) methamphetamine, (3) cocaine, (4) PCP, (5) heroin, and (6) fentanyl at 50  $\mu\text{mol/L}$  showing stepwise decreases in detector signal. (B) Peak representation obtained by differentiation of raw detector signal with respect to time. Separation conditions included a -480 V/cm electric field and pressure starting at 14.5 kPa and decreasing at -25 Pa/s.

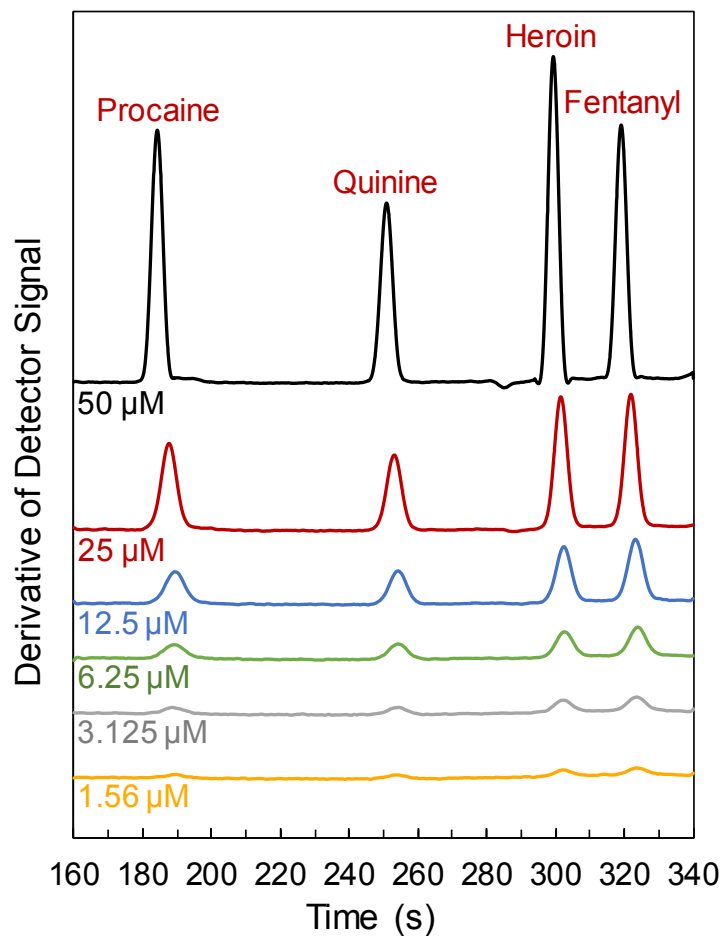

**Figure S6.** GEMBE separation of demonstrative narcotic mixture containing excipients: procaine and quinine, and opioids: heroin and fentanyl at concentrations of (1.56, 3.125, 6.25, 12.5, 25, and 50)  $\mu\text{mol/L}$ . Separation conditions included a  $-480 \text{ V/cm}$  electric field and pressure starting at  $14.5 \text{ kPa}$  and decreasing at  $-25 \text{ Pa/s}$ . Data shifted vertically for visualization.

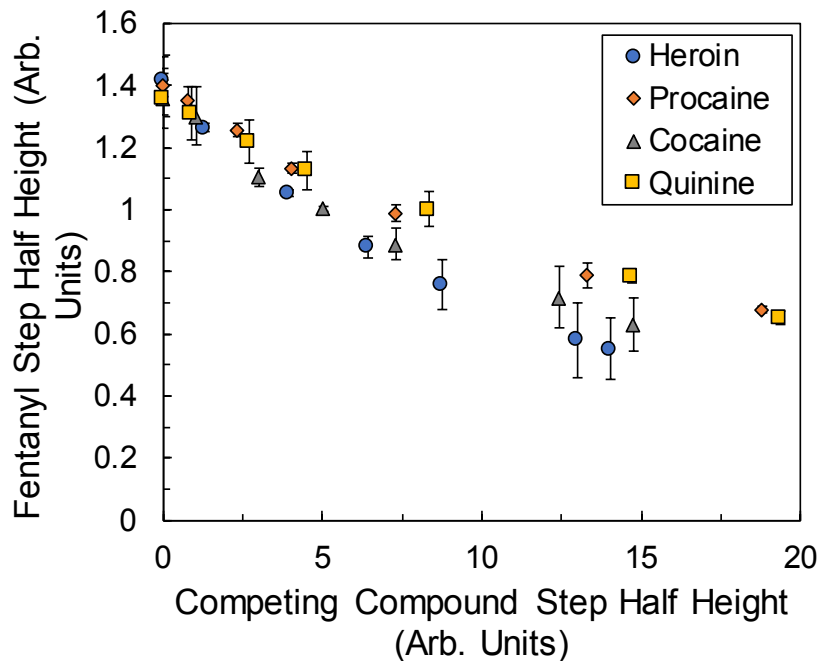

**Figure S7.** Fentanyl signal suppression as a function of competing compound signal for the absolute value of each step half height at binary mixture ratios of 0:1, 1:1, 3:1, 5:1, 10:1, 20:1, and 30:1. Various competing compounds were evaluated, including heroin, cocaine, quinine, and procaine, with fentanyl at constant 10  $\mu\text{mol/L}$ . Average and standard deviations represented for 7 to 10 replicates.



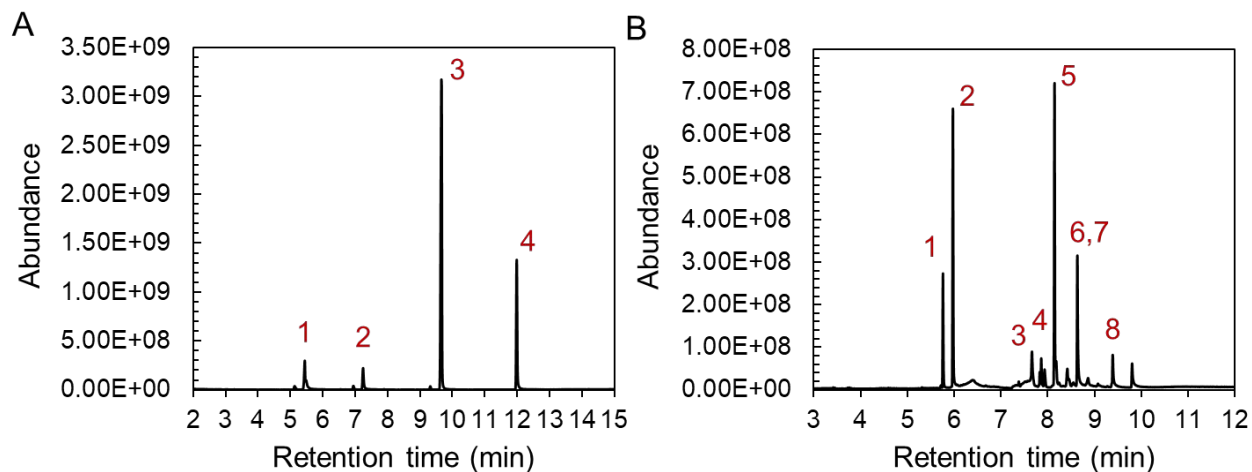

**Figure S8.** Representative gas chromatography separations for complex drug mixtures containing fentanyl related species. (A-B) Adjudicated case samples that contained fentanyl and several additional compounds provided by the Maryland State Police, Forensic Science Division. (A) Labeled chromatograms from a blue-colored suspension with undissolved particulate that contained unidentified cutting agent (1,2), synthetic opioid U-47700 (3), and fentanyl (4). (B) Labeled chromatograms from a clear solution with nonuniform, undissolved white particulate containing caffeine (1), lidocaine (2), codeine (3), 6-monoacetylmorphine (4), heroin (5), coelution of methacryl fentanyl (6) and methoxyacetyl fentanyl (7), and phenyl fentanyl (8).
